# Supplementary material
Source: HighWire-hosted journal article supplement (https://bmjopen.bmj.com/content/15/1/e092746)
Supplement: inline-supplementary-material-1 [file inline-supplementary-material-1.pdf]

Data collection instrument

Interview Guide

Date\_\_\_\_\_

Start Time\_\_\_\_\_End Time\_\_\_\_\_

| Identification and background information            |  |
|------------------------------------------------------|--|
| Respondent’s Code/Pseudonym                          |  |
| Age                                                  |  |
| Sex (male/female)                                    |  |
| Marital status                                       |  |
| Profession                                           |  |
| Nationality                                          |  |
| Highest level of education                           |  |
| Number of years worked with the Ghana Health Service |  |
| Current position                                     |  |

1. Have you heard about mobile health (i.e. mhealth) interventions/applications?

- Prompts
- What are they?
  - What are the mediums used for mhealth applications?
  - How do they work?

2. Do you know any mhealth intervention/application that is currently being used/ever used for maternal healthcare delivery in any part of the country?

- If ever used, why is it no longer in use?

3. Do you think mhealth applications/interventions can be used for maternal healthcare delivery?

- Prompts
- If yes, how can mhealth applications/interventions be used for maternal

healthcare in Ghana and in your facility

-Which specific aspects of maternal healthcare: antenatal, birth, postnatal?

**4. What are the benefits you foresee if mhealth is fully integrated into maternal healthcare?**

-Maternal health and wellbeing

-Newborn's health and wellbeing

**5. Do you think Ghana is ready for effective implementation and utilisation of mhealth interventions/applications for maternal healthcare delivery?**

-What make you think Ghana is ready for this?

-What (additional) specific pre-conditions do you think need to be in place for effective use of mhealth interventions/applications in delivering maternal healthcare?:

- Skills/expertise of maternity care providers

-In urban settings

-In rural settings

**6. Any other comment or information you would like to share with me?**

**Closing remark: Thank you for your time!!!**
