# Supplementary material
Source: HighWire-hosted journal article supplement (https://bmjopen.bmj.com/content/15/1/e092746)
Supplement: inline-supplementary-material-3 [file inline-supplementary-material-3.pdf]

# Mhealth Project

| Name                                                                             | Files | References |
|----------------------------------------------------------------------------------|-------|------------|
| Awareness of any mhealth application for maternity healthcare in use             | 6     | 9          |
| Barriers of mhealth operations                                                   | 1     | 1          |
| Absence of electricity                                                           | 1     | 1          |
| Limited Internet and Smartphone                                                  | 3     | 7          |
| Low Education or Literacy                                                        | 1     | 1          |
| Benefits of fully integrating mhealth into maternal healthcare delivery in Ghana | 3     | 4          |
| Benefits to mother and newborn                                                   | 10    | 12         |
| Benefits to provider                                                             | 16    | 28         |
| Ghana's readiness in integrating M-Health into maternal health care              | 18    | 33         |
| Recommendations for effective implementation of mhealth in maternal healthcare   | 3     | 6          |
| Educating or training healthcare providers                                       | 15    | 19         |
| Educating the Public                                                             | 3     | 4          |
| Effective Planning                                                               | 1     | 1          |
| Fixing Electricity challenges                                                    | 2     | 3          |
| Fixing Internet challenge                                                        | 9     | 12         |
| Introducing into curriculum of health training schools                           | 2     | 3          |
| Logistics and resources                                                          | 4     | 5          |
| Political Will Leadership and Commitment                                         | 4     | 5          |
| Technical Support and Support Supervision                                        | 1     | 2          |
| Mhealth Knowledge                                                                | 21    | 88         |
| Experience with mhealth                                                          | 9     | 21         |
| Knowledge of Safe Delivery App                                                   | 0     | 0          |
| Mediums for using mHealth                                                        | 9     | 15         |
| Phase of maternity care that much require mhealth application                    | 0     | 0          |
| All Phases                                                                       | 10    | 11         |
| ANC                                                                              | 4     | 4          |
| Labour and Postnatal                                                             | 1     | 1          |
| Labour or birth                                                                  | 3     | 6          |

Feb 21, 2024

| Name                             | Files | References |
|----------------------------------|-------|------------|
| Use of mHealth                   | 2     | 2          |
| Assisting Someone to use mHealth | 3     | 4          |
| Challenge faced in using mhealth | 2     | 3          |
| Competency                       | 2     | 2          |
| Frequency of Using mHealth       | 4     | 5          |
| Sought Assistance                | 4     | 7          |

Feb 21, 2024
